# Supplementary material for: Implantable microcoils for intracortical magnetic stimulation
Source: PubMed Central journal article supplement — Sci Adv. 2016 Dec 9;2(12):e1600889. doi: 10.1126/sciadv.1600889 (PMC5148213; doi:10.1126/sciadv.1600889), 2016-12-09
Supplement: 1600889_SM.pdf [file 1600889_SM.pdf]

## Supplementary Materials for **Implantable microcoils for intracortical magnetic stimulation**

Seung Woo Lee, Florian Fallegger, Bernard D. F. Casse, Shelley I. Fried

Published 9 December 2016, *Sci. Adv.* **2**, e1600889 (2016)

DOI: 10.1126/sciadv.1600889

### **This PDF file includes:**

- fig. S1. Power consumption levels for microcoils and other stimulation modalities.
- References (55–58)

## Supplementary Materials

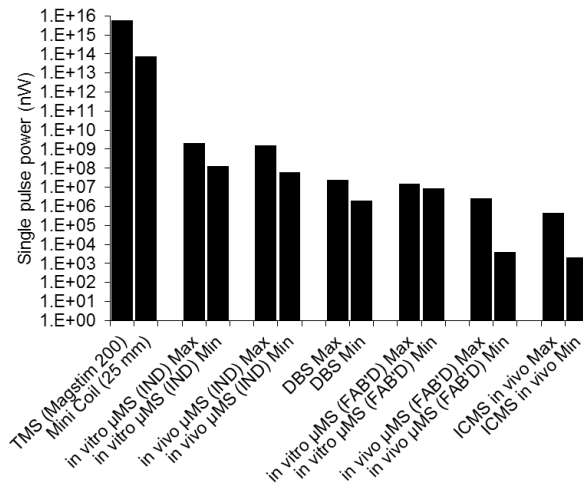

**fig. S1. Power consumption levels for microcoils and other stimulation modalities.**

Minimum & maximum levels of power are calculated from previous published studies as well as from the present study. The corresponding power levels for in vitro & in vivo stimulation were 10 & 0.4 mW (for whisker cortex). (DBS: Deep Brain Stimulation (55); ICMS: Intra-cortical microstimulation (9, 40-42, 56, 57); FAB'D: fabricated microcoil (present study); IND: commercial inductor that comprised the first-generation microcoil (13, 14, 19, 23); Mini Coil (58); TMS: Transcranial Magnetic Stimulation (Magstim 200, 50% power))
